# Supplementary material for: Lowered blood pressure targets identify new, uncontrolled hypertensive cases: patient characteristics and implications for services in Thailand
Source: PubMed Central journal article supplement (PMC7490895; doi:10.1186/s12913-020-05719-z), 2020-09-14
Supplement: 12913_2020_5719_MOESM1_ESM.pdf [file 12913_2020_5719_MOESM1_ESM.pdf]

**1. Demographic data**1.1 Gender  0.Male  1.Female

1.2 Age \_\_\_\_\_ years old

1.3 Height \_\_\_\_\_ cm Weight \_\_\_\_\_ kg

1.4 Marital Status  0.Single  1.Married  2.Divorced1.5 Nationality  0.Thai  1.Other \_\_\_\_\_1.6 Religion  0.Buddhism  1.Other \_\_\_\_\_1.7 Educational level  0.Primary school  1. Secondary school  2. Voluntary school  
 3. Bachelor's degree or higher  4. Other \_\_\_\_\_1.8 Health insurance  0. Yes  1. No1.9 Occupation  0. None  1. Government employee  
 2. Private company employee  3.Other \_\_\_\_\_**1.9 Involvement of caregiver in medication management** 0.None  1.Yes Relation \_\_\_\_\_**1.10 Family history of hypertension** 0.None  1.Yes Relation \_\_\_\_\_**1.11 Cerebrovascular/Cardiovascular disease in family** 0.None  1.Yes Relation \_\_\_\_\_**2. Health information**2.1 Another health issues  0. None  1. Diabetes mellitus  2. Hyperlipidemia  
 3. Other \_\_\_\_\_**3. Health behaviors**

3.1 Have you exercised (Ex. Power walking, swimming, cycling, aerobic dancing) more than 150 minutes/week in the past 3 months?

 0.No  1. Yes

3.2 Have you add sodium to your food (fish sauce, soy sauce, tomato/chili sauce)?

 0. No  1. Add  $\geq$  1 meal/day

3.3 Have you drunk alcohol in the past 3 months?

 0.No  1.Yes

3.4 Have you smoked in the past 3 months?

 0.No  1.Yes

**4. Antihypertensive drugs usage**

4.1 Number of years diagnosed with hypertension \_\_\_\_\_

4.2 Number of years taking anti-hypertensive drugs \_\_\_\_\_

4.3 Class of drugs currently taken (review from medical record)

0. ACEI  1. ARB  2. CCB  3. BB  4. Other \_\_\_\_\_

4.4 Types of medication taken per day \_\_\_\_\_

4.5 Number of times taken per day \_\_\_\_\_

4.6 Any combination drug used?  0. No  1. Yes

4.7 Have you experienced antihypertensive drug's side effect?  0.No  1.Yes symptom \_\_\_\_\_

**5. Morisky Green Levine Test (MGL)**

|                                                                                    | Yes | No |
|------------------------------------------------------------------------------------|-----|----|
| 1. Do you ever forget to take your medicine?                                       |     |    |
| 2. Are you careless at times about taking your medicine?                           |     |    |
| 3. When you feel better do you sometimes stop taking your medicine?                |     |    |
| 4. Sometimes if you feel worse, when you take the medicine, do you stop taking it? |     |    |
